# 1 Analysis methods for measuring fNIRS 2 responses generated by a block-design 3 paradigm

4 Robert Luke<sup>1,3</sup>, Eric Larson<sup>7</sup>, Maureen J Shader<sup>3,5</sup>, Hamish Innes-Brown<sup>4,5</sup>, Lindsey Van Yper<sup>1</sup>  
5 Adrian KC Lee<sup>2,7</sup>, Paul F Sowman<sup>6</sup>, David McAlpine<sup>1</sup>

6 1. Macquarie University Hearing & Department of Linguistics, Australian Hearing Hub, Macquarie University,  
7 Sydney, Australia

8 2. Department of Speech & Hearing Sciences and Institute for Learning & Brain Sciences, University of  
9 Washington, Seattle, WA, USA

10 3. The Bionics Institute Melbourne

11 4. Eriksholm Research Centre, Oticon A/S

12 5. Department of Medical Bionics, The University of Melbourne

13 6. Department of Cognitive Science, Faculty of Medicine, Health and Human Sciences, Macquarie University,  
14 Sydney, Australia

15 7. Institute for Learning & Brain Sciences, University of Washington, Seattle, WA, USA

16

## 17 [Overview](#)

18 **Significance:** fNIRS is an increasingly popular tool in auditory research, but the range of  
19 analysis procedures employed across studies complicates interpretation of data.

20 **Aim:** To assess the impact of different analysis procedures on the morphology, detection, and  
21 lateralization of auditory responses in fNIRS. Specifically, whether averaging or GLM-based  
22 analyses generate different experimental conclusions, when applied to a block-protocol  
23 design. The impact of parameter selection of GLMs on detecting auditory-evoked responses  
24 was also quantified.

25 **Approach:** 17 listeners were exposed to three commonly employed auditory stimuli: noise,  
26 speech, and silence. A block design was employed, comprising sounds of 5-s duration, and  
27 10–20 s silent intervals.

28 **Results:** Both analysis procedures generated similar response morphologies and amplitude  
29 estimates, and both also indicated responses to speech to be significantly greater than to  
30 noise and silence. Neither approach indicated a significant effect of brain hemisphere on  
31 responses to speech. Methods to correct for systemic hemodynamic responses using short  
32 channels improved detection at the individual level.

33 **Conclusions:** Consistent with theoretical considerations, simulations, and other experimental  
34 domains, GLM and averaging analyses generate the same group-level experimental  
35 conclusions. We release this dataset publicly for use in future development and optimization  
36 of algorithms.

37

## 38 1. Introduction

39 Functional near-infrared spectroscopy (fNIRS) is an increasingly popular technique (Yücel et  
40 al., 2017) employed to investigate auditory-cortical function, and provides for a unique set of  
41 qualities that make it ideal for auditory research. fNIRS devices are typically very quiet  
42 compared to functional magnetic resonance imaging (fMRI) with which it shares a similar  
43 biologically generated signal. fNIRS is unaffected by electrical or magnetic interference from  
44 hearing devices such as cochlear implants or hearing aids, all of which are either contra-  
45 indicated or generate large artifacts in fMRI as well as in electro- and magneto-  
46 encephalography (EEG and MEG, respectively). fNIRS devices are generally relatively portable  
47 and do not require participants or patients to be isolated in a shielded chamber, or to have  
48 their head-position fixed, making it well suited for use in low- or non-compliant groups,

49 including children, the elderly, and the cognitively impaired. It therefore provides an ideal  
50 imaging modality for clinical applications.

51 fNIRS has been used to investigate a variety of auditory research questions and applications.  
52 A primary use has been the investigation of cortical processing of physical qualities of sound,  
53 such as intensity, and amplitude and frequency modulations, and auditory-spatial cues  
54 (Weder et al., 2020; Weder et al., 2018; Zhang et al., 2018). fNIRS has also been employed to  
55 evaluate the perceptual qualities of speech and listening effort, as well as language  
56 development in normal-hearing and hearing-impaired populations (Anderson et al., 2019;  
57 Lawrence et al., 2018; Mushtaq et al., 2019; Pollonini et al., 2014; Rovetti et al., 2019;  
58 Rowland et al., 2018; Sevy et al., 2010; Wiggins et al., 2016b; Wijayasiri et al., 2017; Zhang et  
59 al., 2020). Research questions relating to the development of auditory cortical function  
60 (Gervain et al., 2008), and cortical reorganization following impaired sensory input and  
61 subsequent rehabilitation (Anderson et al., 2017; Wiggins and Hartley, 2015) have been  
62 investigated using fNIRS, as have outcomes related to cochlear implantation (Anderson et al.,  
63 2019) and auditory pathologies such as tinnitus (Basura et al., 2018; Shoushtarian et al.,  
64 2020).

65 Despite this utility, however, relative to other neuroimaging modalities such as fMRI, EEG,  
66 and MEG, fNIRS has been employed only recently by hearing scientists, and considerable  
67 variability exists in the experimental designs and analysis techniques used by different  
68 researchers. This variability can make it difficult to interpret data sets, or to replicate or  
69 compare findings across studies, or between research teams. The experimental designs most  
70 commonly employed by auditory fNIRS researchers are block- and event-related designs.  
71 Experimenters must consider a range of factors in their experimental design, including the

72 statistical power of the protocol, the duration of the experiment, and whether the design  
73 provides the flexibility to study the effect of interest ( Birn et al., 2002; Friston et al., 1999;  
74 Henson, 2007; Mechelli et al., 2003). For example, an event-related design may enable an  
75 investigator to examine the response to individual words in an ongoing sentence, something  
76 not possible when employing a block design.

77 Here, we compare two common analysis procedures that can be applied in experiments  
78 employing a block design. Block-design experiments present a single stimulus type  
79 continuously for an extended time interval (e.g. 5 s), followed by an inter-stimulus interval  
80 (i.e., where no stimulus is presented) of sufficient duration for the hemodynamic response to  
81 return to an approximate basal level (Brockway, 2000; Rombouts et al., 1997). Although  
82 commonly employed, no consensus exists as to the most appropriate analysis procedures for  
83 this type of experimental design; new algorithms and procedures are regularly published  
84 without cross-validation or theoretical consideration.

85 Analysis procedures for block designs typically lie in one of two categories: averaging analysis,  
86 where the fNIRS measurement is segmented and averaged relative to the onset of the  
87 stimulus (Dawson, 1954); and general linear model (GLM) analysis, where one or more model  
88 hemodynamic responses are fitted to the entirety of the measured fNIRS signal (Cohen, 1997;  
89 and for a recent overview in the context of fNIRS see Huppert, 2016). The signal averaging  
90 approach assumes that the noise component of the measured fNIRS signal is a random  
91 process with zero mean, and unrelated to the biological signal of interest. In contrast, the  
92 GLM is capable of accounting for a more complex model of signal noise (Barker et al., 2013).  
93 Although for non-overlapping responses such as are assumed in a block design, the GLM  
94 model is reduced to a block average, suggesting that both analyses should tend to generate

95 similar outcomes (Dale and Buckner, 1997; Santosa et al., 2019), due to the statistical  
96 properties of the fNIRS signal, GLM analysis may be a more appropriate method with which  
97 to analyze fNIRS data (Huppert, 2016). These two analysis methods have been described and  
98 evaluated for different fNIRS analysis parameters in computer simulations and behavioral  
99 motor experiments (Santosa et al., 2019; Tak and Ye, 2014), but a direct comparison has yet  
100 to be made for research investigating audition.

101 In general, auditory-cortical responses in fNIRS have been shown to be reliable at a group  
102 level (Wiggins et al., 2016a). Many investigations of auditory cortical function target relatively  
103 deep (relative to the skull) cortical regions such as Heschl's gyrus, of which a typical fNIRS  
104 device might generate less than 1% specificity (Zimeo Morais et al., 2018). This low specificity  
105 makes individual-level measurements unreliable, largely due to the poor signal-to-noise ratio;  
106 the measured stimulus-evoked hemodynamic response is small compared to all other sources  
107 of bio-generated changes in the fNIRS signal. This challenge has motivated the need for a  
108 comparison of averaging and GLM analysis specifically for auditory fNIRS signals, in order to  
109 understand the influence of analysis choices when analyzing such a small signal-of-interest.  
110 Here, we investigate whether averaging and GLM style analysis applied to the same dataset  
111 generate data that support the same experimental conclusions.

112 Due to the statistical properties of the noise within fNIRS signals, GLM-style analysis has been  
113 suggested to be a more appropriate method with which to analyze fNIRS data (Huppert,  
114 2016). As such, we also investigated the influence of the parameters employed in GLM  
115 analysis on the true and false detection-rates of sound-generated fNIRS responses. Of  
116 particular importance in fNIRS experiments is the separation (and possible reduction) of  
117 systemic contributions (changes in the measured fNIRS signal that are not due to the effect

118 of neurovascular coupling) to the measured signal when estimating neural responses  
119 (Tachtsidis and Scholkmann, 2016). This has particular relevance for auditory experiments, as  
120 systemic components of fNIRS measurements have been shown to be related to the  
121 characteristics of acoustic stimuli (Shoushtarian et al., 2019).

122 Many approaches have been proposed to remove the influence of systemic components on  
123 the estimation of the neural response (Fabbri et al., 2004; Saager and Berger, 2005; Santosa  
124 et al., 2020; Scholkmann et al., 2014; Wyser et al., 2020). Most use specialized channels  
125 designed not to measure neural activity but the systemic response only. These channels  
126 typically have a source-detector separation of less than 1 cm, and are often referred to as  
127 ‘short’ channels. Recently, Santosa et al. (2020) concluded that including short-channel  
128 information as a regressor of no interest within a GLM analysis resulted in the most accurate  
129 estimation of the underlying neural response compared to spatial and temporal filtering,  
130 regression, and component analysis.

131 We therefore investigated the effect of including information from short channels on the  
132 detection of auditory fNIRS responses. Algorithms that remove systemic components have  
133 previously been evaluated and contrasted (Santosa et al., 2020; Scholkmann et al., 2014;  
134 Wyser et al., 2020), but we apply these methods specifically in the context of two commonly  
135 used auditory stimuli: speech and band-pass noise.

136 Speech is the primary mode for auditory communication, and is therefore widely employed  
137 in auditory experiments. Noise signals are often used to investigate basic auditory processing,  
138 as the statistical properties of the signal can be precisely controlled. These two stimuli are  
139 often contrasted to investigate language-specific processing, or combined to investigate  
140 speech processing in challenging listening environments. Both stimuli can hold an infinite

141 number of forms; speech may contain prosodic cues or be spectrally degraded, and noise may  
142 comprise different frequency ranges, contain modulations in amplitude or frequency, or  
143 transition over time. Here, we employed two different stimuli: speech comprising three  
144 concatenated sentences in quiet, and a 400-Hz band of noise centered at 500 Hz.

145 We first describe the methods used to produce and present stimuli, and to generate data. We  
146 then undertake qualitative analysis examining the morphology of fNIRS responses to auditory  
147 stimuli using averaging and GLM analyses, and assess the influence of different analysis  
148 parameters on the detection of auditory fNIRS responses, and on the rate of false positives.  
149 Finally, we investigate whether the averaging and GLM approaches provide similar  
150 experimental conclusions when applied to the same dataset. Both approaches were used to  
151 investigate two common questions in auditory neuroscience. First, do two different stimulus  
152 conditions generate a different response amplitude? Second, are cortical-hemispheric  
153 difference apparent in evoked responses?

154 One challenge when developing an experimental protocol for fNIRS is to understand the  
155 effects of different analysis choices, and to optimize the signal-processing procedure. Further,  
156 it is important not to optimize a specific analysis pipeline using the same data from which  
157 scientific conclusions will be drawn (Kriegeskorte et al., 2009). The dataset we report here  
158 will be released publicly to assist in the development of future auditory fNIRS pipelines and  
159 algorithm development. In a similar vein, we note that that we are not endeavouring to  
160 generate scientific conclusions concerning the relative cortical processing of speech and  
161 noise. Rather, our intention is to provide an understanding of the choice of parameters on  
162 conclusions reached by statistical analysis of auditory-generated fNIRS responses generated  
163 using averaging and GLM techniques.

164

## 165 2. Methods

### 166 2.1 Experimental Design

167 Seventeen participants volunteered for this project. All participants indicated no history of  
168 hearing concerns. Participants were aged between 22 and 40 years. Data were collected  
169 under the Macquarie University Ethics Application Reference 52020640814625.

170 Participants were seated in a sound-attenuating booth in a comfortable chair for the duration  
171 of the experiment, which lasted approximately 25 minutes. Participants were instructed not  
172 to pay attention to the sounds and were offered the choice of watching a silent, subtitled film  
173 during the experiment; seven participants accepted this option. NIRS data were recorded  
174 using a NIRx NIRScoutX device with APD detectors. The data were saved to disk with a sample  
175 rate of 5.2 Hz. 12 source channels and 12 detector channels were employed in the fNIRS  
176 optode-cap configuration, with eight additional short detectors distributed across the head.  
177 Sources were placed at the positions AF7, F3, F7, FC5, T7, CP5, O1, POz, O2, Iz, CP6, and T8.  
178 Detectors were placed at the positions F5, C5, TP7, CP3, P5, PO3, P04, Oz, P6, CP4, TP8, and  
179 C6. Short detectors were placed at AF7, F7, T7, CP5, O1, O2, CP6, and T8 (Figure 1). These  
180 optodes were selected to target four regions of interest (ROI) using the fOLD toolbox (Zimeo  
181 Morais et al., 2018), including the left inferior frontal gyrus (IFG), the left and right superior  
182 temporal gyri (STG), and the occipital lobe. The left inferior frontal gyrus is indicated in speech  
183 and language processing, whilst the superior temporal gyri are indicated in auditory  
184 processing. The occipital lobe is indicated in visual processing and as a possible additional site



185 for speech processing, particularly in cross-modal plasticity studies, but this region was not  
186 expected to show significant responses in the current study.

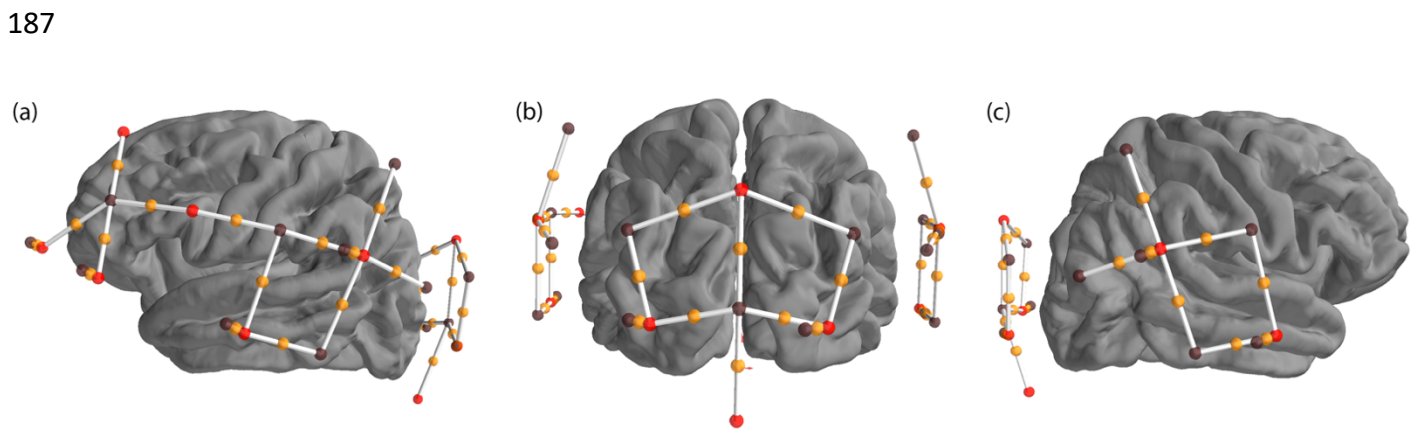

189 *Figure 1: Location of sources and detectors. Four regions of interest were created to cover the left inferior frontal gyrus, the*  
190 *left and right superior temporal gyri, and the occipital region. Sources are shown as red dots, detectors are shown as black*  
191 *dots, channels are shown as white lines with an orange dot representing the midpoint. The montage is shown from the left*  
192 *(a), back (b) and right (c) views of the brain.*

193 Participants listened to auditory stimuli presented diotically (i.e., the same sound to both  
194 ears) *via* Etymotic Research ER-2 insert-phones connected to an RME Fireface UCX soundcard  
195 (16 bits, 44.1 kHz sampling rate). Speech was presented at 80 dB SPL, and noise (separately)  
196 at 85 dB SPL. Stimuli were calibrated to a Casella Cel-110/2 sound source using a Norsonic  
197 sound-level meter (Norsonic SA, Norway) and an ear simulator (RA0045 G.R.A.S., Denmark).  
198 Participants were exposed to three stimulus conditions: speech, noise, and silence. The  
199 speech stimulus consisted of three concatenated sentences from the AustIN speech *corpus*  
200 (Dawson et al., 2013) with a total duration of 5.25 s. The noise stimulus consisted of a uniform  
201 distribution of frequency content between 300-700 Hz, and was of 5-s duration. Five seconds  
202 of silence was used as the control condition. Stimuli were presented in random order with an  
203 inter-stimulus interval selected randomly for each trial from a uniform distribution in the  
204 range 10-20 s. Twenty trials were presented for each condition, resulting in a total of 60 trials  
205 per participant.

206

## 207 2.2 Analysis

208 All analyses were performed using MNE (version 0.21.2) (Gramfort et al., 2013; Gramfort et  
209 al., 2014) and MNE-NIRS (version 0.0.1) (<https://mne.tools/mne-nirs/>), which makes  
210 extensive use of the Nilearn package (version 0.70) (Abraham et al., 2014) for GLM analysis.  
211 First, a qualitative analysis was performed to understand the morphology of the measured  
212 signal, followed by a quantitative analysis to evaluate the influence of different parameter  
213 selection on the detection of auditory responses. Finally, both the averaging and GLM analysis  
214 techniques were used to compare the response amplitude to speech vs. noise, and for relative  
215 activation in the left vs. right cortical hemispheres. All analyses were applied to the same  
216 dataset described in Section 2.1.

217

### 218 2.2.1 The morphology of auditory responses

219

220 Hemodynamic responses vary with location on the scalp and experimental condition (Cui et  
221 al., 2011; Stoppelman et al., 2013). As such, morphology of fNIRS responses to speech and  
222 noise stimuli was investigated qualitatively using two independent procedures. The first  
223 procedure was an averaging style analysis, and the second a finite impulse response (FIR) GLM  
224 approach. Each analysis was performed on each of the three experimental conditions.

225

226

227 *2.2.1.1 Averaging analysis*

228

229 The averaging analysis consisted of several steps, starting with down-sampling the data to 3  
230 Hz, and conversion to optical density. The scalp-coupling index (Pollonini et al., 2014) was  
231 calculated for each channel between 0.7 and 1.45 Hz, and channels with an index value below  
232 0.8 were removed. Data from each channel were then further cleaned by applying temporal-  
233 derivative distribution repair (Fishburn et al., 2019) and short-channel regression based on  
234 the nearest short channel (Saager and Berger, 2005; Scholkmann et al., 2014). Briefly, this  
235 approach to short-channel regression subtracts a scaled version of the signal obtained from  
236 the nearest short channel from the signal obtained from the long channel. The modified Beer  
237 Lambert law was then applied, with a partial pathlength factor of 0.1, converting the optical-  
238 density measurements to changes in hemoglobin concentration. Next, channels with source-  
239 detector separations outside the range 20-40 mm were excluded, followed by application of  
240 the signal-improvement algorithm based on negative correlation between oxygenated and  
241 deoxygenated hemoglobin dynamics (Cui et al., 2010). A bandpass filter was then applied  
242 between 0.01 and 0.7 Hz with a transition bandwidth of 0.005 and 0.3 Hz for the low- and  
243 high-pass edges, respectively. The data were cut into epochs from 3 s before stimulus onset  
244 to 14 s after, and a linear detrend was applied to each epoch. Epochs with a peak-to-peak  
245 difference in any channel exceeding 100  $\mu$ M were then excluded. The average response *per*  
246 participant for each channel and for each condition was exported.

247

248

249 *2.2.1.2 Finite impulse response model analysis*

250

251 In a second, and independent, analysis, data was entered into a GLM analysis using a  
252 deconvolution FIR model. This method makes no assumptions as to the shape of the  
253 hemodynamic response. Instead, a series of impulses following the onset of the stimulus are  
254 used as regressors to model the neural response. The morphology of the response can then  
255 be estimated by summing all the FIR components after multiplication by each component's  
256 weight as estimated by the GLM. See Huppert (2016) and Santosa et al. (2018) for a summary  
257 of FIR and canonical approaches within the fNIRS context.

258 Prior to the GLM analysis, data were down-sampled to 1 Hz, and then converted to optical  
259 density. A lower sample rate was employed as the scalp-coupling index was not computed,  
260 and therefore, higher frequencies were not required. Next, channels with a source-detector  
261 separation outside the range 20-40 mm were excluded, and the modified Beer-Lambert law  
262 applied to the data, as for the averaging analysis. A GLM was then applied using a FIR model  
263 with 14 components (i.e., 14 s); this number of components was selected to ensure parity  
264 with the epoching-window approach employed in the averaging analysis. Channels were then  
265 combined into a ROI by averaging the estimates with an inverse weighting by the standard  
266 error of the GLM fit. The individual-level FIR results were then entered into a linear mixed-  
267 effects (LME) model to extract the effect of FIR delay, condition, and chromophore, whilst  
268 accounting for the random effect of subject. Santosa et al. (2018) provides for a description  
269 of these second-level statistical models.

270

271 2.2.2 Canonical model analysis: Effect of parameters on response detection

272

273 Next, the effect of several analysis parameters on the detection rate for auditory responses  
274 was investigated. In contrast to the FIR approach (Section 2.2.1), this analysis used a  
275 predefined canonical model of the evoked hemodynamic response function (HRF), specifically  
276 the canonical SPM HRF, which is generated from a linear combination of two Gamma  
277 functions (Penny et al., 2011). The effect of sampling rate, correction for systemic responses,  
278 and boxcar duration on the true and false-positive detection rates was explored. For  
279 simplicity, we visualized only the data for oxyhemoglobin, and not deoxyhemoglobin, signals,  
280 as the effects of different parameters was similar for both.

281 Only responses from optodes placed over the superior temporal gyrus were analyzed. A false  
282 positive was defined as a response detected in the (control) condition of silence. A true  
283 positive was defined as a response detected to the speech and noise conditions. Using these  
284 definitions, a receiver operating characteristic (ROC) was defined for each analysis procedure,  
285 and the area under the curve was extracted to quantify the analysis performance. We also  
286 extracted the true positive rate (TPR) resulting from a false-positive rate (FPR) of 5%, as  
287 commonly employed in clinical studies.

288 Specific analysis parameters were varied in this section, but each analysis consisted of the  
289 same general procedure—a re-sampling the data, followed by conversion to optical density  
290 and hemoglobin concentration. Next, channels with source-detector separation outside the  
291 20- to 40-mm range were excluded, as were any channels outside the superior temporal gyrus  
292 ROI. A design matrix was then constructed by creating a boxcar function based on the trigger  
293 timing, and convolving this with the SPM HRF. A GLM was performed on the data with this

294 design matrix, including the use of a 4<sup>th</sup>-order auto-regressive noise model, generating  
295 channel-level data that were used to construct a ROC curve. Channel-level data were then  
296 combined into a ROI using a weighted-average procedure, in which each channel was  
297 weighted by the inverse of the standard error of the GLM. This procedure was termed the  
298 “No Correction” analysis.

299 To analyze the effect of different choices of processing, several modifications were made to  
300 the procedure outlined above. Different short-channel approaches were applied to correct  
301 for systemic response, including adding the mean of the short channels as a regressor to the  
302 GLM, adding the individual short channels as regressors to the GLM, as well as adding the  
303 principal components of the short channels as regressors to the GLM (adding either a subset,  
304 or all components, were investigated). These procedures were termed the “Systemic  
305 Corrected” analysis. Similarly, the effect of sample rate was investigated by down-sampling  
306 the raw signal using different rates.

307

### 308 2.2.3 Comparison of conditions and response lateralization

309

310 Finally, a group-level analysis was performed to determine if the averaging and GLM analyses  
311 both provided the same conclusion to two research questions. First, is there a difference in  
312 response amplitude between the speech and noise stimuli? And second, is there a  
313 hemispheric difference in the response to speech stimuli? We focus on group-level analysis  
314 as this has been demonstrated to be reliable in auditory experiments (Wiggins et al., 2016a).  
315 We also investigate whether including the approach to correcting for the systemic response  
316 correction deemed most effective (see Section 2.3) modifies experimental conclusions.

317

318 *2.2.3.1 Averaging analysis*

319

320 For the averaging analysis, the same approach was made as in Section 2.2, after which, the  
321 mean value between 5 and 7 s of the average waveform for each participant was exported  
322 for analysis by statistical testing.

323

324 *2.2.3.2 Canonical model analysis*

325

326 For the canonical-model GLM analysis, two procedures were used; the No Correction  
327 approach and the Systemic Corrected approach, the latter of which included all principal  
328 components as regressors in the GLM to compensate for systemic responses. Both analyses  
329 used a sample rate of 0.6 Hz and a 3 s duration for the boxcar function.

330

331 *2.2.3.3 Statistical analysis*

332

333 To summarize the dataset, results from the Systemic Corrected approach were entered into  
334 a linear mixed-effects model that accounted for condition, ROI, and chromophore with  
335 participant as a random variable. In Reger-Wilkinson notation this would be described as  $\beta \sim$   
336  $-1 + \text{Condition:ROI:Chroma} + (1 | \text{ID})$ .

337 For each of the three analyses described above (averaging, GLM No Correction, GLM Systemic  
338 Corrected), a response estimate was exported for each participant, each condition, and each

339 ROI. These data were then used to address two issues. First, using all channels over both left  
340 and right superior temporal gyri as a single ROI, a linear mixed-effects model was used to  
341 determine if the response to speech was different from that to noise. Participant was included  
342 as a random effect. In Roger-Wilkinson notation this is described as  $\beta \sim \text{Condition} + (1|ID)$ .  
343 Second, a linear mixed-effects model was used to determine if the left superior temporal  
344 gyrus shows a different response amplitude to the right in the speech condition, described as  
345  $\beta \sim \text{ROI} + (1|ID)$  in Roger-Wilkinson notation.

### 346 3. Results & Discussion

347 To ensure that the filter was parameterized correctly, as to remove unwanted components  
348 of the measurements and retain the frequency content of interest, the spectrum of the raw  
349 fNIRS data extracted from an example data file is plotted along with the expected  
350 hemodynamic response (Figure 2). The spectral content of the model boxcar function of the  
351 experiment convolved with a model neural response (Figure 2, red curve) indicates that the  
352 majority of the signal content is around 0.05 Hz, consistent with the average presentation  
353 rate of the experiment. The spectral content of an example measurement (Figure 2, black  
354 curve) indicates a clear signal generated by the systemic pulse rate of around 1 Hz. The filter-  
355 frequency response (Figure 2, blue) clearly retains the peak of the expected response, but  
356 excludes the low-frequency drift and high-frequency (pulse-rate) components.

357



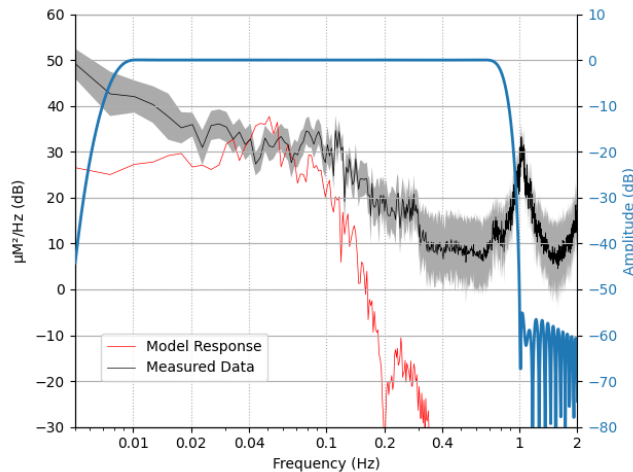

358

359 *Figure 2: Summary of frequency information. The frequency content of the expected neural response based on trigger*  
360 *information and model hemodynamic response function is shown in red (arbitrary scaling). The applied filter is shown in blue.*  
361 *Raw data from an example file is shown in black, with the solid line indicating the mean value across all channels and the*  
362 *shading representing 95% confidence intervals across channels. Note that the filter retains most of the experimental*  
363 *frequency content while removing high-frequency heart rate content (around 1 Hz) and low frequency content in the*  
364 *measured data.*

365

### 366 3.1 The morphology of fNIRS responses to speech and noise

367 Two approaches were applied to investigate the morphology of responses to auditory stimuli  
368 in each ROI. Here, we provide a qualitative description of morphology.

369

#### 370 3.1.1 Averaging analysis

371

372 To summarize the group-level averaging analysis results, a time series visualizes the average  
373 signal across participants and a bootstrapped 95% confidence band around the mean for each  
374 condition and ROI (Figure 3). Responses were observed in the STG regions for both noise and  
375 speech stimuli, but not for the silent conditions. For the silence condition, flat measurements  
376 were observed over the entire waveform in all ROIs. For both speech and noise conditions,  
377 the largest responses were measured from optodes placed over the left and right superior

378 temporal gyri. These responses show a canonical hemodynamic response, with a peak  
379 response around 5- to 7-s after stimulus onset, consistent with the duration of the stimulus.  
380 As such, only channels over the superior temporal gyri were used subsequently to quantify  
381 response morphology.

382

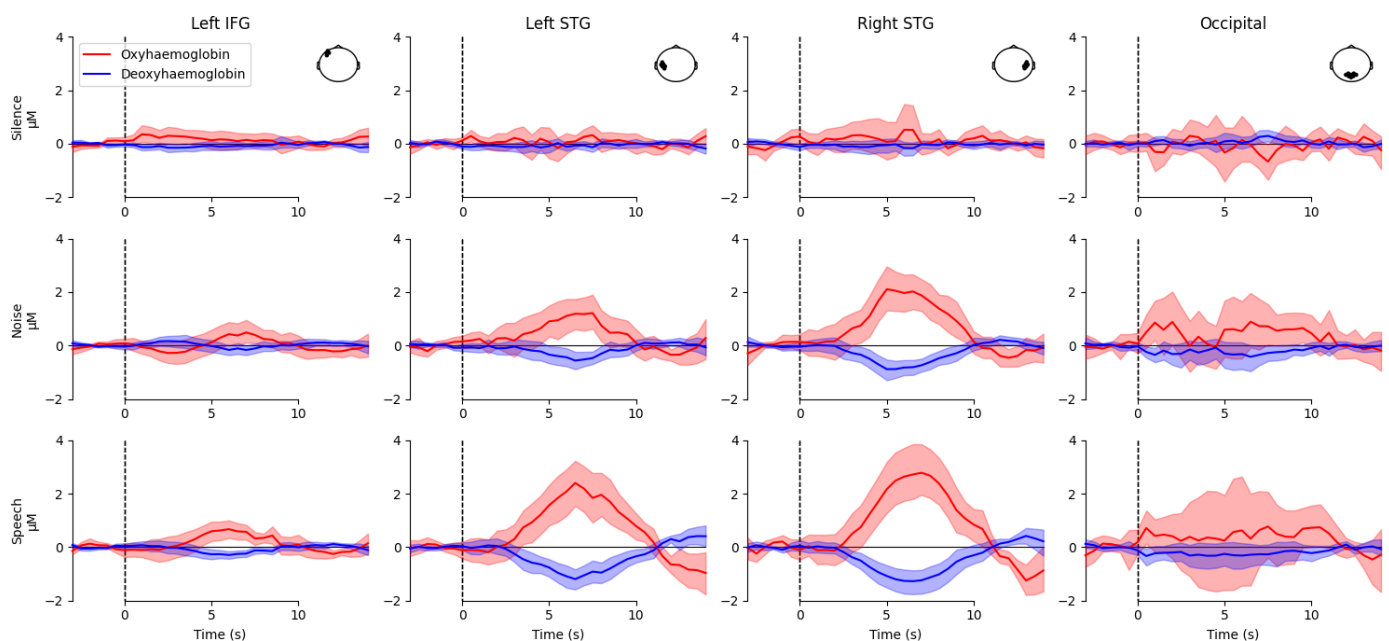

384 *Figure 3: Morphology of auditory fNIRS responses using the averaging approach for all regions of interest and conditions.*  
385 *Each column represents a different region of interest as illustrated in the top down head view inset. Each row represents a*  
386 *different stimulus condition. Red represents oxyhemoglobin, blue represents deoxyhemoglobin. Shaded lines indicate 95%*  
387 *confidence intervals. Responses were observed over the left and right superior temporal gyrus (STG) for both speech and noise*  
388 *conditions, but not for silence.*

389

### 390 3.1.2 Finite impulse response model analysis

391

392 A FIR GLM analysis was also used to examine the morphology of the hemodynamic response,  
393 using only optodes situated over the superior temporal gyri. A comparison of the estimated  
394 response morphology using the averaging and the FIR (GLM) techniques (Figure 4) indicates  
395 broad agreement between the methods with regard to the timing and amplitude of

396 hemodynamic responses, although the FIR approach generates an estimate of the response  
397 to speech greater than that suggested by averaging.

398

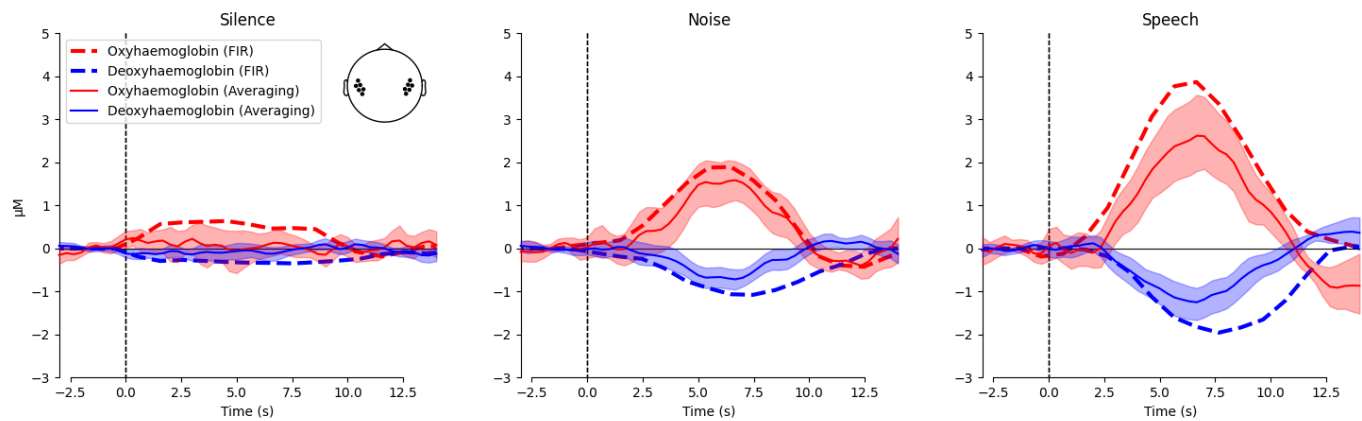

400 *Figure 4: Morphology of auditory fNIRS responses over the superior temporal gyrus. Each column represents a different*  
401 *stimulus condition. Responses are illustrated for both oxy- and deoxyhemoglobin, red and blue respectively. The shaded areas*  
402 *and solid line represent the mean and 95% confidence intervals for the averaging approach. The dashed lines illustrate the*  
403 *estimates for the FIR GLM approach. Note that the averaging and FIR GLM fits are quite similar, except for a larger estimate*  
404 *for the FIR approach in the speech condition.*

405

### 406 3.2 Canonical model analysis: Effect of parameters on response detection

407 We next examined the effect of different analysis parameters on the detection of responses  
408 in individual participants. ROC curves for both ROIs (Figure 5a) and individual channels (Figure  
409 5b) indicates ROIs show greater sensitivity to true positives than individual channels, likely  
410 due to noisy channels being inversely weighted. Subsequently, we focus on the channel-level  
411 results (Figure 5c).

412 Two summary metrics extracted from the ROC curves are reported. First is the traditional area  
413 under the curve (AUC) measure. A larger value indicates better performance across the entire  
414 range of false positive values. Also reported is the true positive rate (TPR) occurring at the 5%  
415 false positive rate (FPR). We chose to focus on the metric at 5% FPR, as opposed to the AUC

416 metric, because this tends to be more relevant for clinical purposes. Many of the differences  
417 in the ROC occur at a high FPR at and above 50%, however, this FPR would be considered  
418 unacceptable in a clinical setting.

419

### 420 3.2.1 Effect of short channel regression on detection of auditory responses

421

422 We first examined the effect of different short-channel based methods of reducing systemic  
423 responses from the estimated neural responses. The effect of adding different  
424 representations of the short channels as regressors in the GLM is explored. These  
425 representations include a limited number of principal components, all principal components,  
426 the individual short channels, or the mean of the short channels per each chromophore.

427 Without short-channel correction, responses were detected in less than 20% of  
428 measurements for a false-positive rate of 5%. As expected, applying the short-channel  
429 method to remove systemic components resulted in a substantial improvement to the  
430 detection rate (Santosa et al., 2020; Scholkmann et al., 2014; Tak and Ye, 2014; Wyser et al.,  
431 2020). Although it is common to use just the first or second principal components as  
432 regressors (Weder et al., 2020), we observed that including all components resulted in the  
433 best performance, consistent with Santosa et al. (2020).

434 We also observed that including all the short channels or the mean as regressors, instead of  
435 the principal components, also results in good detection rates. Whilst we observed no effect  
436 of including all principal components or just individual channels, we selected the principal  
437 components for subsequent analysis, as this is suggested to be the most effective method to  
438 compensate for systemic components in the estimation of neural responses (Santosa et al.,

439 2020). Neither of these approaches require a specific selection criterion, making them easy  
440 to implement, describe, and replicate.

441

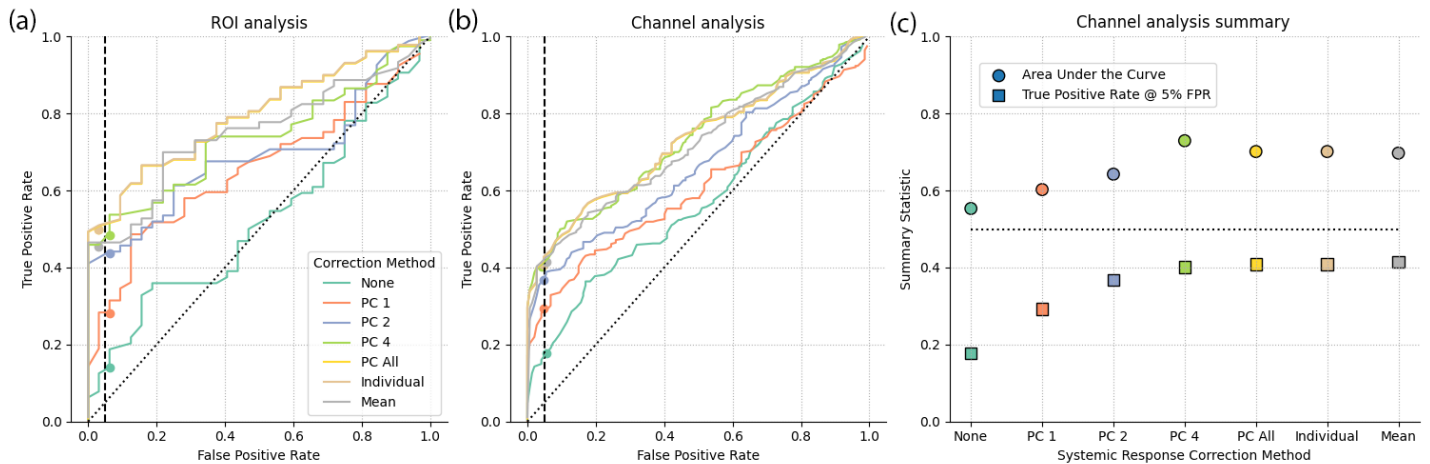

443 *Figure 5: The effect of systemic response correction on auditory fNIRS response estimates. Receiver operating characteristic*  
444 *curves for the superior temporal gyri region of interest (a) and individual channels over the superior temporal gyri (b).*  
445 *Summary statistics from the individual channel ROC (c) with area under the curve (circle) and true positive rate at 5% false*  
446 *positive rate (square) metrics for each method. Analysis with no systemic correction is included as a reference (green), analysis*  
447 *with 1, 2, 4, or all principal components (PC) of the short channels as regressors in the GLM is shown (orange, blue, light*  
448 *green, yellow), all short channels included as individual regressors (brown) or averaged per chromophore (gray). Note that*  
449 *all systemic response correction approaches provide improved detection over no correction. Including all principal*  
450 *components, the mean of the short channels, or all individual channels provides best auditory response detection.*

451

### 452 3.2.2 Effect of sample rate on the detection of auditory responses

453

454 fNIRS devices often require a trade-off between the number of channels and acquisition  
455 sample-rate, and understanding the effect of this trade-off is of practical concern for auditory  
456 experiments; performance generally decreases with lower sample rates (Figure 6). Analysis  
457 of data with a higher sample rate requires more memory and computational resources, so we  
458 selected 0.6 Hz as a sample rate that balances computational cost with accuracy.

459

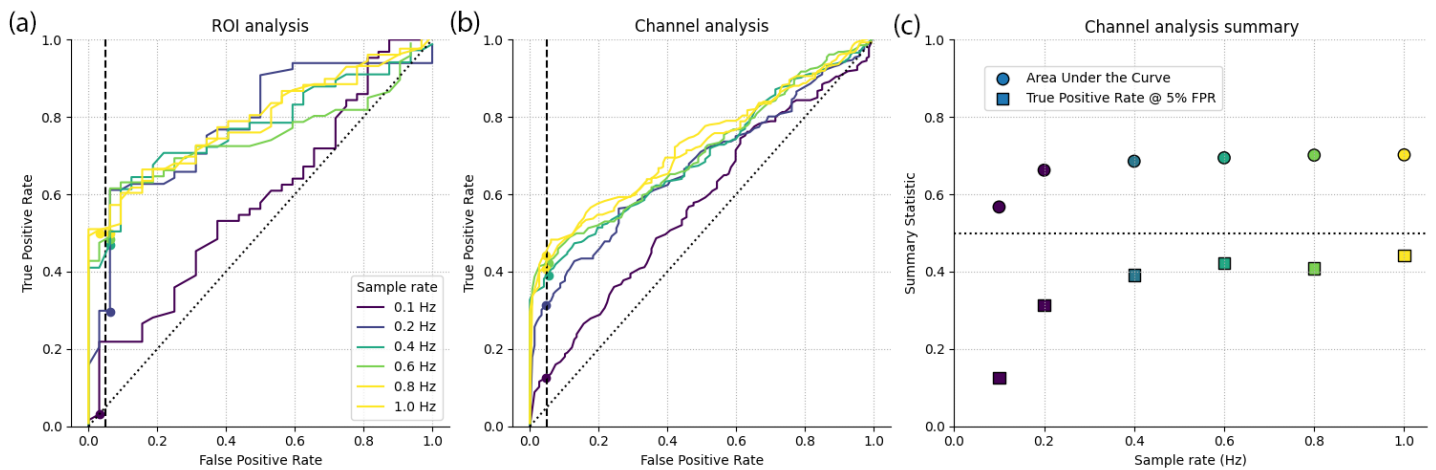

461 *Figure 6: The effect of sample rate on auditory fNIRS response estimates. Receiver operating characteristic curves for the*  
462 *superior temporal gyri region of interest (a) and individual channels over the superior temporal gyri (b). Summary statistics*  
463 *from the individual channel ROC (c) with area under the curve (circle) and true positive rate at 5% false positive rate (square)*  
464 *metrics for data sampled at different rates. Analysis indicates improved performance with increasing sample rate, but with*  
465 *limited improvement above approximately 0.6 Hz.*

466

### 467 3.2.3 Effect of boxcar duration on the detection of auditory responses

468

469 The fNIRS responses to our 5-s block stimuli peaks around 6 to 7 s after stimulus onset (Figure  
470 4). GLM analyses fit an expected neural response to the data, in which the expected neural  
471 response is generated by convolving a model HRF with a boxcar function generated from the  
472 onset times of the stimuli. The length of the boxcar function can be varied to account for the  
473 duration of the neural response, and is typically set to the duration of the stimulus. However,  
474 response morphology can change with stimuli and brain location. As such, we investigated  
475 the effect of boxcar length on response detection to auditory stimuli, and find that the 3-s  
476 boxcar function provides the greatest true positive rate, for a pre-determined 5% false-  
477 positive rate (Figure 7). Note, however, that the reduction in performance that comes from  
478 using swapping out 3-s boxcar function for one of 1-s or 5-s duration is smaller than the  
479 reduction in performance that comes about by not employing systemic correction, or when

480 too low a sample rate is used. An alternative approach to account for differences between  
481 the model and the measured response is to include a derivative term in the design matrix  
482 (Mushtaq et al., 2020; Zhang et al., 2020). However, since we observed good correspondence  
483 between the response morphology and the expected canonical response, we did not include  
484 derivative terms in our analysis.  
485

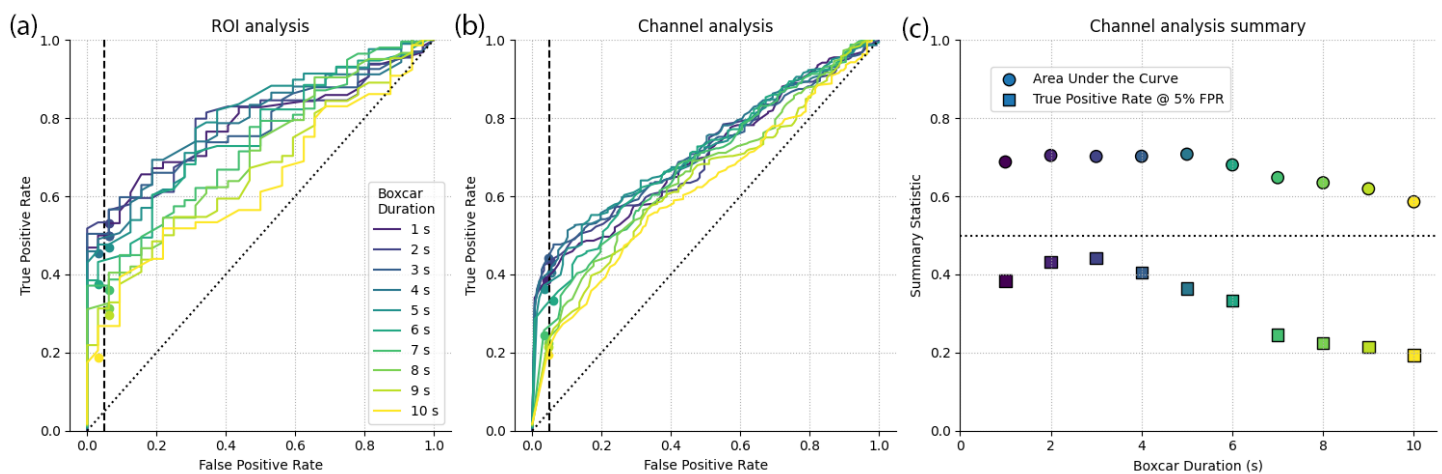

487 *Figure 7: The effect of boxcar function duration on auditory fNIRS response estimates. Receiver operating characteristic curves*  
488 *for the superior temporal gyrus region of interest (a) and individual channels over the superior temporal gyrus (b). Summary*  
489 *statistics from the individual channel ROC (c) with area under the curve (circle) and true positive rate at 5% false positive rate*  
490 *(square) metrics for different boxcar durations. Analysis indicates optimal detection rates for a 3 s boxcar function, note that*  
491 *the stimulus duration was 5 s.*

492

493 Additional analysis parameters beyond the scope of the current study include effects arising  
494 from selection of the specific auto-regressive model (Huppert (2016), or alternate canonical  
495 functions (Glover (1999)). Based on the data thus far, we maintained a sample rate of 0.6 Hz  
496 in future analyses, and included all principal components as regressors, employing a 3-s  
497 boxcar function to model the hemodynamic response.

498

### 499 3.3 Comparison of conditions and response lateralization

500 Finally, we investigated whether, when applied at a group level, the averaging and GLM  
501 approaches to fNIRS analysis provide for the same experimental conclusions. Two common  
502 questions in auditory experiments were explored. First, could we detect a difference in  
503 response amplitude between two conditions, in this example: speech and noise. And second,  
504 within one condition, is a difference in response amplitudes apparent across brain  
505 hemispheres, often termed “lateralization of responses.”

506 We first summarized the dataset (GLM analogue of Figure 2) by modelling the response  
507 amplitude as a factor of ROI, condition, and chromophore in a LME model, with participant  
508 as a random factor (Figure 8). Consistent with the observed average waveforms (Figure 3), no  
509 significant responses were observed in either the left inferior frontal gyrus or occipital cortice,  
510 and the silent, control condition generated no responses in any ROI. Significant responses  
511 were observed to both speech and noise in the two ROIs of superior temporal gyrus. The lack  
512 of any detectable response to speech stimuli in left inferior frontal gyrus may be due to the  
513 passive nature of the experimental task; this cortical region has been indicated in the  
514 processing of speech, particularly in active tasks with more challenging acoustic conditions.

515



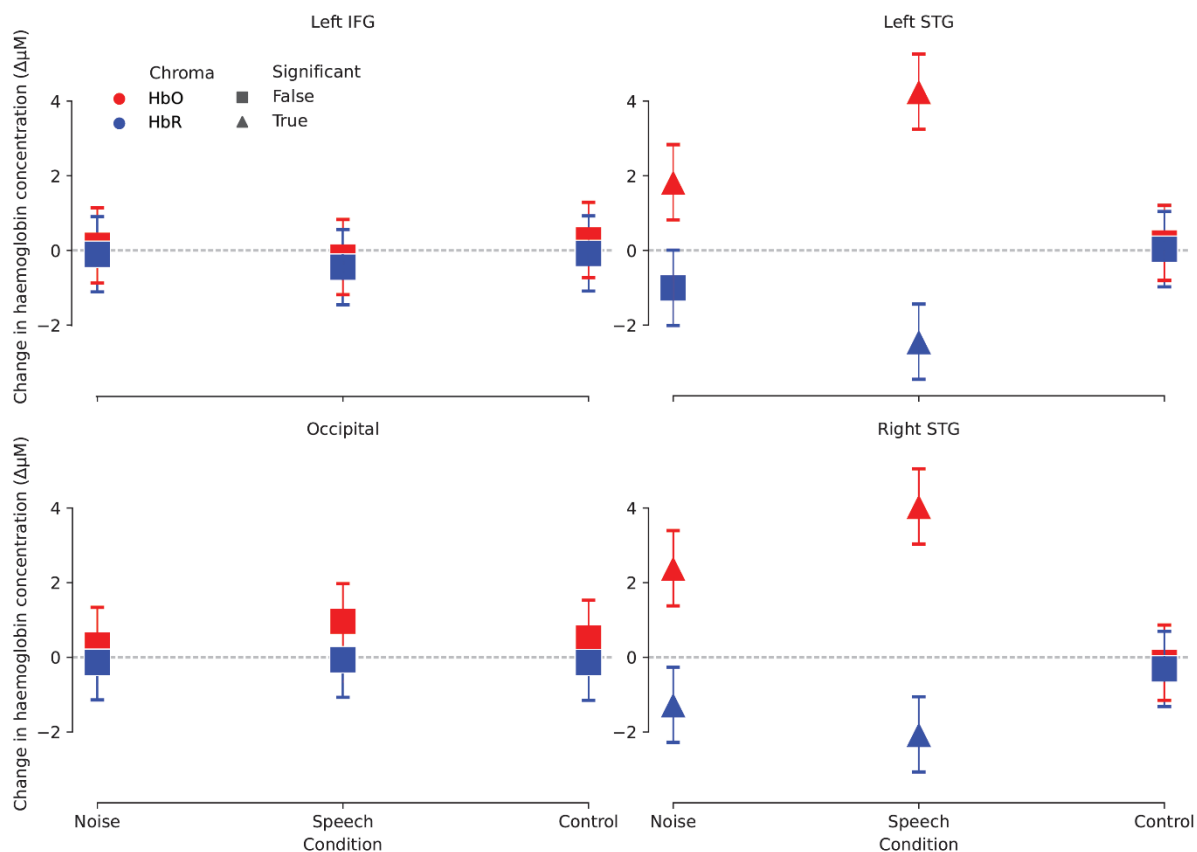

516

517 *Figure 8: Estimates of response per condition and region of interest using the GLM analysis. Oxy- and deoxyhemoglobin*  
518 *responses are shown in red and blue respectively. The presence of a response (statistical difference to zero) is indicated by a*  
519 *triangle. Error bars represent the 95% confidence intervals of the mean.*

520

521 3.3.1 Does speech elicit a greater neural response than noise?

522

523 We next addressed the questions of whether responses to speech are larger than responses  
524 to noise over the superior temporal gyri ROI, and whether inter-hemispheric differences in  
525 activation are observed.

526

527 *3.3.1.1 Comparison of averaging and GLM result*

528

529 Using the Systemic Corrected GLM with a LME model, which examined the effect of condition  
530 with participant as a random effect, we observed that the speech-evoked oxyhemoglobin  
531 response was 2.043  $\mu\text{M}$  larger than that evoked by noise ( $p < .001$ ). Using the average  
532 waveform amplitude 5 to 7 s post stimulus onset, we observed that the estimated response  
533 to speech was 1.0  $\mu\text{M}$  larger than to the noise ( $p < .01$ ). From this, we conclude that both  
534 analysis methods generate the same experimental conclusion, consistent with visual  
535 inspection of the averaging and FIR GLM analyses (Figure 3). The estimated response  
536 amplitude difference was larger for the GLM approach, possibly due to this approach better  
537 accounting for the statistical nature of the fNIRS noise (Huppert, 2016). The time window  
538 used in the averaging approach may also reduce the estimated response amplitude, whereas  
539 a peak picking approach may result in a slightly larger estimate of the response. However,  
540 automated peak-picking approaches are prone to error, particularly when the signal-to-noise  
541 ratio is low, whilst manual methods of peak-picking reduce the repeatability of an analysis.

542

#### 543 *3.3.1.2 Effect of systemic component rejection*

544

545 Analyzing the data using the GLM approach, with no correction for systemic responses—the  
546 No Correction analysis—indicates that the speech response was 2.306  $\mu\text{M}$  larger than that to  
547 the noise stimulus ( $p = .025$ ). Not including corrections for systemic responses generated a  
548 similar effect size to the Systemic Corrected analysis. This correspondence between methods  
549 of analysis may be due to the systemic response being relatively small, or the systemic  
550 response being similar across conditions. Our experiment was a passive listening-task, and  
551 participants were asked not to pay attention to the stimuli. Studies that have observed an

552 event-locked systemic component to auditory stimuli required participants to generate a  
553 response, for example, by means of a button press (Shoushtarian et al., 2019). These, more-  
554 active, experimental paradigms may generate a larger systemic component, and therefore  
555 elicit greater differences between analyses corrected or uncorrected for systemic effects.

556

557 3.3.2 Does speech elicit a larger response in left or right hemisphere?

558

559 *3.3.2.1 Comparison of averaging and GLM result*

560

561 Finally, to address whether a difference in response amplitude exists between left and right  
562 cortical hemispheres to speech stimuli, results from the Systemic Corrected GLM were used  
563 in a LME model examining the effect of ROI, with participant as a random effect. The model  
564 reported that estimated amplitude of the fNIRS response in the right hemisphere was not  
565 significantly different to that in the left ( $\beta = -0.21$ ,  $p = .73$ ). Similarly, the same LME model  
566 reported no significant lateralization of the response amplitude when the averaging analysis  
567 was employed ( $\beta = 1.0$ ,  $p = .13$ ).

568

569 *3.3.2.2 Effect of systemic-component rejection*

570

571 When assessing the No Correction GLM data at a group level, no significant effect of  
572 lateralization was observed ( $\beta = 0.18$ ,  $p = .87$ ), indicating that not compensating for systemic  
573 components does not generate aberrant lateralization effects. However, we cannot conclude

574 from these data that, if a lateralization effect were present, it would be detectable without  
575 systemic correction.

576

## 577 4. Conclusion

578 A reference block-design auditory fNIRS dataset was created with two common acoustic  
579 stimuli. Using this dataset, it was determined that both an averaging approach and a FIR GLM  
580 analysis resulted in similar response morphology. The effect of correcting for systemic  
581 hemodynamic responses using short optical channels was evaluated on the response  
582 detection of the GLM approach, where it was determined that including the individual short  
583 channels, or the principal components of the short channels, resulted in similar practical  
584 improvements to detection. At a group level, it was observed that both the averaging and  
585 GLM approach produced the same experimental conclusions to two common research  
586 questions. Not including short-channel corrections did not change the group-level  
587 conclusions. This may be due to the fact that the task was passive in nature, and may not hold  
588 for experiments requiring active participation.

589

## 590 5. Code, Data, and Materials Availability

591 The fNIRS data reported in this article will be released on OSF.io and github.com in the BIDS  
592 data format to allow ease of reuse (Gorgolewski et al., 2016). All the code functions used in  
593 this analysis are available at [mne.tools/mne-nirs](https://mne.tools/mne-nirs) and the associated GitHub page, along with  
594 example analysis tutorials.

595

## 596 6. Acknowledgments/Funding Sources

597 This study was supported by an Australian Research Council Laureate Fellowship (No.  
598 FL160100108) awarded to David McAlpine. E. Larson was supported by the National Institutes  
599 of Health under Grant R01NS104585-01A1.

600

## 601 7. Bibliography

602

603 Abraham, A., Pedregosa, F., Eickenberg, M., Gervais, P., Mueller, A., Kossaifi, J., Gramfort, A.,  
604 Thirion, B., Varoquaux, G., 2014. Machine learning for neuroimaging with scikit-learn. *Front*  
605 *Neuroinform* 8, 14.

606 Anderson, C.A., Wiggins, I.M., Kitterick, P.T., Hartley, D.E., 2017. Adaptive benefit of cross-  
607 modal plasticity following cochlear implantation in deaf adults. *Proceedings of the National*  
608 *Academy of Sciences* 114, 10256-10261.

609 Anderson, C.A., Wiggins, I.M., Kitterick, P.T., Hartley, D.E., 2019. Pre-operative brain imaging  
610 using functional near-infrared spectroscopy helps predict cochlear implant outcome in deaf  
611 adults. *Journal of the Association for Research in Otolaryngology* 20, 511-528.

612 Barker, J.W., Aarabi, A., Huppert, T.J., 2013. Autoregressive model based algorithm for  
613 correcting motion and serially correlated errors in fNIRS. *Biomed Opt Express* 4, 1366-1379.

614 Basura, G.J., Hu, X.S., Juan, J.S., Tessier, A.M., Kovelman, I., 2018. Human central auditory  
615 plasticity: A review of functional near-infrared spectroscopy (fNIRS) to measure cochlear  
616 implant performance and tinnitus perception. *Laryngoscope investigative otolaryngology* 3,  
617 463-472.

618 Brockway, J.P., 2000. Two functional magnetic resonance imaging f(MRI) tasks that may  
619 replace the gold standard, Wada testing, for language lateralization while giving additional  
620 localization information. *Brain Cogn* 43, 57-59.

- 621 Cohen, M.S., 1997. Parametric analysis of fMRI data using linear systems methods.  
622 Neuroimage 6, 93-103.
- 623 Cui, X., Bray, S., Bryant, D.M., Glover, G.H., Reiss, A.L., 2011. A quantitative comparison of  
624 NIRS and fMRI across multiple cognitive tasks. Neuroimage 54, 2808-2821.
- 625 Cui, X., Bray, S., Reiss, A.L., 2010. Functional near infrared spectroscopy (NIRS) signal  
626 improvement based on negative correlation between oxygenated and deoxygenated  
627 hemoglobin dynamics. Neuroimage 49, 3039-3046.
- 628 Dale, A.M., Buckner, R.L., 1997. Selective averaging of rapidly presented individual trials using  
629 fMRI. Hum. Brain Mapping, 329-340.
- 630 Dawson, G.D., 1954. A summation technique for the detection of small evoked potentials.  
631 Electroencephalography and Clinical Neurophysiology 6, 65-84.
- 632 Dawson, P.W., Hersbach, A.A., Swanson, B.A., 2013. An Adaptive Australian Sentence Test  
633 in Noise (AuSTIN). Ear and Hearing 34, 592-600.
- 634 Fabbri, F., Sassaroli, A., Henry, M.E., Fantini, S., 2004. Optical measurements of absorption  
635 changes in two-layered diffusive media. Phys Med Biol 49, 1183-1201.
- 636 Fishburn, F.A., Ludlum, R.S., Vaidya, C.J., Medvedev, A.V., 2019. Temporal Derivative  
637 Distribution Repair (TDDR): A motion correction method for fNIRS. Neuroimage 184, 171-179.
- 638 Gervain, J., Macagno, F., Cogoi, S., Pena, M., Mehler, J., 2008. The neonate brain detects  
639 speech structure. Proc Natl Acad Sci U S A 105, 14222-14227.
- 640 Glover, G.H., 1999. Deconvolution of impulse response in event-related BOLD fMRI.  
641 Neuroimage 9, 416-429.
- 642 Gorgolewski, K.J., Auer, T., Calhoun, V.D., Craddock, R.C., Das, S., Duff, E.P., Flandin, G., Ghosh,  
643 S.S., Glatard, T., Halchenko, Y.O., 2016. The brain imaging data structure, a format for  
644 organizing and describing outputs of neuroimaging experiments. Scientific data 3, 1-9.
- 645 Gramfort, A., Luessi, M., Larson, E., Engemann, D.A., Strohmeier, D., Brodbeck, C., Goj, R., Jas,  
646 M., Brooks, T., Parkkonen, L., Hamalainen, M., 2013. MEG and EEG data analysis with MNE-  
647 Python. Front Neurosci 7, 267.

- 648 Gramfort, A., Luessi, M., Larson, E., Engemann, D.A., Strohmeier, D., Brodbeck, C., Parkkonen,  
649 L., Hamalainen, M.S., 2014. MNE software for processing MEG and EEG data. *Neuroimage* 86,  
650 446-460.
- 651 Huppert, T.J., 2016. Commentary on the statistical properties of noise and its implication on  
652 general linear models in functional near-infrared spectroscopy. *Neurophotonics* 3, 010401.
- 653 Kriegeskorte, N., Simmons, W.K., Bellgowan, P.S., Baker, C.I., 2009. Circular analysis in  
654 systems neuroscience: the dangers of double dipping. *Nat Neurosci* 12, 535-540.
- 655 Lawrence, R.J., Wiggins, I.M., Anderson, C.A., Davies-Thompson, J., Hartley, D.E.H., 2018.  
656 Cortical correlates of speech intelligibility measured using functional near-infrared  
657 spectroscopy (fNIRS). *Hear Res* 370, 53-64.
- 658 Mushtaq, F., Wiggins, I.M., Kitterick, P.T., Anderson, C.A., Hartley, D.E.H., 2019. Evaluating  
659 time-reversed speech and signal-correlated noise as auditory baselines for isolating speech-  
660 specific processing using fNIRS. *PLoS One* 14, e0219927.
- 661 Mushtaq, F., Wiggins, I.M., Kitterick, P.T., Anderson, C.A., Hartley, D.E.H., 2020. The  
662 Benefit of Cross-Modal Reorganization on Speech Perception in Pediatric Cochlear Implant  
663 Recipients Revealed Using Functional Near-Infrared Spectroscopy. 14.
- 664 Penny, W.D., Friston, K.J., Ashburner, J.T., Kiebel, S.J., Nichols, T.E., 2011. Statistical  
665 parametric mapping: the analysis of functional brain images. Elsevier.
- 666 Pollonini, L., Olds, C., Abaya, H., Bortfeld, H., Beauchamp, M.S., Oghalai, J.S., 2014. Auditory  
667 cortex activation to natural speech and simulated cochlear implant speech measured with  
668 functional near-infrared spectroscopy. *Hear Res* 309, 84-93.
- 669 Rombouts, S.A., Barkhof, F., Hoogenraad, F.G., Sprenger, M., Valk, J., Scheltens, P., 1997. Test-  
670 retest analysis with functional MR of the activated area in the human visual cortex. *AJNR Am*  
671 *J Neuroradiol* 18, 1317-1322.
- 672 Rovetti, J., Goy, H., Pichora-Fuller, M.K., Russo, F.A., 2019. Functional Near-Infrared  
673 Spectroscopy as a Measure of Listening Effort in Older Adults Who Use Hearing Aids. *Trends*  
674 *Hear* 23, 2331216519886722.
- 675 Rowland, S.C., Hartley, D.E.H., Wiggins, I.M., 2018. Listening in Naturalistic Scenes: What Can  
676 Functional Near-Infrared Spectroscopy and Intersubject Correlation Analysis Tell Us About the  
677 Underlying Brain Activity? *Trends Hear* 22, 2331216518804116.

- 678 Saager, R.B., Berger, A.J., 2005. Direct characterization and removal of interfering absorption  
679 trends in two-layer turbid media. *J Opt Soc Am* 22, 1874-1882.
- 680 Santosa, H., Fishburn, F., Zhai, X., Huppert, T.J., 2019. Investigation of the sensitivity-  
681 specificity of canonical- and deconvolution-based linear models in evoked functional near-  
682 infrared spectroscopy. *Neurophotonics* 6, 025009.
- 683 Santosa, H., Zhai, X., Fishburn, F., Huppert, T., 2018. The NIRS Brain AnalyzIR Toolbox.  
684 Algorithms 11.
- 685 Santosa, H., Zhai, X., Fishburn, F., Sparto, P.J., Huppert, T.J., 2020. Quantitative comparison of  
686 correction techniques for removing systemic physiological signal in functional near-infrared  
687 spectroscopy studies. *Neurophotonics* 7, 035009.
- 688 Scholkmann, F., Metz, A.J., Wolf, M., 2014. Measuring tissue hemodynamics and oxygenation  
689 by continuous-wave functional near-infrared spectroscopy--how robust are the different  
690 calculation methods against movement artifacts? *Physiol Meas* 35, 717-734.
- 691 Sevy, A.B., Bortfeld, H., Huppert, T.J., Beauchamp, M.S., Tonini, R.E., Oghalai, J.S., 2010.  
692 Neuroimaging with near-infrared spectroscopy demonstrates speech-evoked activity in the  
693 auditory cortex of deaf children following cochlear implantation. *Hear Res* 270, 39-47.
- 694 Shoushtarian, M., Alizadehsani, R., Khosravi, A., Acevedo, N., McKay, C.M., Nahavandi, S.,  
695 Fallon, J.B., 2020. Objective measurement of tinnitus using functional near-infrared  
696 spectroscopy and machine learning. *PLoS One* 15, e0241695.
- 697 Shoushtarian, M., Weder, S., Innes-Brown, H., McKay, C.M., 2019. Assessing hearing by  
698 measuring heartbeat: The effect of sound level. *PLoS One* 14, e0212940.
- 699 Stoppelman, N., Harpaz, T., Ben-Shachar, M., 2013. Do not throw out the baby with the bath  
700 water: choosing an effective baseline for a functional localizer of speech processing. *Brain*  
701 *Behav* 3, 211-222.
- 702 Tachtsidis, I., Scholkmann, F., 2016. False positives and false negatives in functional near-  
703 infrared spectroscopy: issues, challenges, and the way forward. *Neurophotonics* 3, 031405.
- 704 Tak, S., Ye, J.C., 2014. Statistical analysis of fNIRS data: a comprehensive review. *Neuroimage*  
705 85 Pt 1, 72-91.



- 706 Weder, S., Shoushtarian, M., Olivares, V., Zhou, X., Innes-Brown, H., McKay, C., 2020. Cortical  
707 fNIRS Responses Can Be Better Explained by Loudness Percept than Sound Intensity. *Ear Hear*  
708 41, 1187-1195.
- 709 Weder, S., Zhou, X., Shoushtarian, M., Innes-Brown, H., McKay, C., 2018. Cortical Processing  
710 Related to Intensity of a Modulated Noise Stimulus-a Functional Near-Infrared Study. *J Assoc*  
711 *Res Otolaryngol* 19, 273-286.
- 712 Wiggins, I.M., Anderson, C.A., Kitterick, P.T., Hartley, D.E., 2016a. Speech-evoked activation  
713 in adult temporal cortex measured using functional near-infrared spectroscopy (fNIRS): Are  
714 the measurements reliable? *Hear Res* 339, 142-154.
- 715 Wiggins, I.M., Hartley, D.E., 2015. A synchrony-dependent influence of sounds on activity in  
716 visual cortex measured using functional near-infrared spectroscopy (fNIRS). *PLoS One* 10,  
717 e0122862.
- 718 Wiggins, I.M., Wijayasiri, P., Hartley, D., 2016b. Shining a light on the neural signature of  
719 effortful listening. *The Journal of the Acoustical Society of America* 139, 2074-2074.
- 720 Wijayasiri, P., Hartley, D.E.H., Wiggins, I.M., 2017. Brain activity underlying the recovery of  
721 meaning from degraded speech: A functional near-infrared spectroscopy (fNIRS) study. *Hear*  
722 *Res* 351, 55-67.
- 723 Wyser, D., Mattille, M., Wolf, M., Lamercy, O., Scholkmann, F., Gassert, R., 2020. Short-  
724 channel regression in functional near-infrared spectroscopy is more effective when  
725 considering heterogeneous scalp hemodynamics. *Neurophotonics* 7, 035011.
- 726 Yücel, M.A., Selb, J.J., Huppert, T.J., Franceschini, M.A., Boas, D.A.J.C.o.i.b.e., 2017. Functional  
727 near infrared spectroscopy: enabling routine functional brain imaging. 4, 78-86.
- 728 Zhang, M., Alamatsaz, N., Ihlefeld, A., 2020. Hemodynamic responses link individual  
729 differences in informational masking to the vicinity of superior temporal gyrus.  
730 2020.2008.2021.261222.
- 731 Zhang, M., Mary Ying, Y.L., Ihlefeld, A., 2018. Spatial Release From Informational Masking:  
732 Evidence From Functional Near Infrared Spectroscopy. *Trends Hear* 22, 2331216518817464.
- 733 Zimeo Morais, G.A., Balardin, J.B., Sato, J.R., 2018. fNIRS Optodes' Location Decider (fOLD): a  
734 toolbox for probe arrangement guided by brain regions-of-interest. *Sci Rep* 8, 3341.  
735
